# Supplementary material
Source: ML conference proceedings conference paper supplement (https://proceedings.mlr.press/v97/shen19d.html)
Supplement: Supplementary file [file shen19d-supp.pdf]

## 7. Appendix

### 7.1. Why SVRPG does not work

Recall the importance weight from Section 5.2, which is defined in (Papini et al., 2018)

$$w(\theta^t, \tilde{\theta}; \tau) := \frac{p(\tau|\pi_{\tilde{\theta}})}{p(\tau|\pi_{\theta^t})} = \prod_{h=1}^H \frac{\pi_{\tilde{\theta}}(a_h|s_h)}{\pi_{\theta^t}(a_h|s_h)}, \quad (28)$$

and the SVRPG gradient estimator

$$\mathbf{g}_{vr}^t := \tilde{\mathbf{g}} + \mathbf{g}(\theta^t; \mathcal{M}) - \frac{1}{|\mathcal{M}|} \sum_{\tau \in \mathcal{M}} w(\theta^t, \tilde{\theta}; \tau) \mathbf{g}(\tilde{\theta}; \{\tau\}), \quad (29)$$

where  $\tilde{\theta}$  and  $\tilde{\mathbf{g}}$  are the reference point and its corresponding unbiased estimator respectively, and  $\mathcal{M}$  is a mini-batch of trajectories sampled from  $p(\cdot|\pi_{\theta^t})$ .

While this importance sampling technique removes the bias, the variance of estimator (29) cannot be properly bounded since

$$\begin{aligned} & \mathbb{E}_{\mathcal{M}} \|\mathbf{g}_{vr}^t - \nabla J(\theta^t)\|^2 \\ & \leq \frac{1}{|\mathcal{M}|} \mathbb{E}_{\tau} \|\mathbf{g}(\theta^t; \{\tau\}) - w(\theta^t, \tilde{\theta}; \tau) \mathbf{g}(\tilde{\theta}; \{\tau\})\|^2 \\ & = \frac{1}{|\mathcal{M}|} \int_{\tau} \frac{1}{p(\tau; \pi_{\theta^t})} \|p(\tau; \pi_{\theta^t}) \cdot \mathbf{g}(\theta^t; \{\tau\}) - p(\tau; \pi_{\tilde{\theta}}) \cdot \mathbf{g}(\tilde{\theta}; \{\tau\})\|^2 \mathbf{d}\tau, \end{aligned}$$

and the term  $\frac{1}{p(\tau; \pi_{\theta^t})}$  in the integral can be infinity large. The lack of proper variance control deprives SVRPG of its high sample-efficiency. Even under the strong assumption that the variance of the importance weight  $w(\theta^t, \tilde{\theta}; \tau)$  is bounded (Assumption 4.3 in (Papini et al., 2018)),  $\mathcal{O}(\frac{1}{\epsilon^4})$  random trajectories are still required by SVRPG to achieve an  $\epsilon$ -FOSP (4) by scrutinizing the convergence result, which is the same as the original policy-gradient type method.

### 7.2. Derivation of Policy Gradient and Policy Hessian

Let  $\tau = \{s_1, a_1, \dots, s_H, a_H\}$  be a trajectory sampled according to  $p(\tau; \pi_{\theta})$  and define  $\tau_h := \{s_1, a_1, \dots, s_h, a_h\}$  for any  $h \in [H]$ . For simplicity of notation we will denote

$$\ell_{\theta}^{\tau_h} := \log p(\tau_h; \pi_{\theta}), \quad \bar{\mathcal{R}}_{\gamma}^{\tau_h} := \gamma^h \bar{\mathcal{R}}(a_h|s_h)$$

in the following discussion. From (3) and (2), we have

$$J(\theta) = \sum_{h=1}^H \mathbb{E}_{\tau \sim p(\tau; \pi_{\theta})} [\bar{\mathcal{R}}_{\gamma}^{\tau_h}] = \sum_{h=1}^H \mathbb{E}_{\tau_h \sim p(\tau_h; \pi_{\theta})} [\bar{\mathcal{R}}_{\gamma}^{\tau_h}],$$

where we replace  $\tau$  by  $\tau_h$  since  $\bar{\mathcal{R}}_{\gamma}^{\tau_h}$  is independent of the randomness after  $a_h$ . To compute the policy gradient

$$\nabla J(\theta) = \sum_{h=1}^H \int_{\tau_h} \bar{\mathcal{R}}_{\gamma}^{\tau_h} \nabla p(\tau_h; \pi_{\theta}) \mathbf{d}\tau_h = \sum_{h=1}^H \int_{\tau_h} \bar{\mathcal{R}}_{\gamma}^{\tau_h} p(\tau_h; \pi_{\theta}) \nabla \ell_{\theta}^{\tau_h} \mathbf{d}\tau_h,$$

where we use the log-trick in the second equation

$$\nabla p(\tau_h; \pi_{\theta}) = p(\tau_h; \pi_{\theta}) \nabla \log p(\tau_h; \pi_{\theta}) = p(\tau_h; \pi_{\theta}) \nabla \ell_{\theta}^{\tau_h}.$$

The policy gradient can be further simplified:

$$\begin{aligned}
 \nabla J(\theta) &= \sum_{h=1}^H \int_{\tau_h} \bar{\mathcal{R}}_\gamma^{\tau_h} p(\tau_h; \pi_\theta) \nabla \ell_\theta^{\tau_h} \mathbf{d}\tau_h \\
 &= \sum_{h=1}^H \mathbb{E}_{\tau_h \sim p(\tau_h; \pi_\theta)} [\bar{\mathcal{R}}_\gamma^{\tau_h} \sum_{i=1}^h \nabla \log \pi_\theta(a_i | s_i)] \\
 &= \sum_{h=1}^H \sum_{i=1}^h \mathbb{E}_{\tau_h \sim p(\tau_h; \pi_\theta)} [\bar{\mathcal{R}}_\gamma^{\tau_h} \nabla \log \pi_\theta(a_i | s_i)] \\
 &= \sum_{h=1}^H \sum_{i=1}^h \mathbb{E}_{\tau \sim p(\tau; \pi_\theta)} [\bar{\mathcal{R}}_\gamma^{\tau_h} \nabla \log \pi_\theta(a_i | s_i)],
 \end{aligned}$$

where in the last equality we use that  $\bar{\mathcal{R}}_\gamma^{\tau_h} \nabla \log \pi_\theta(a_i | s_i)$  with  $i \leq h$  is independent of the randomness after  $a_h$ . Exchange the summation over  $i$  and  $h$  to obtain

$$\begin{aligned}
 \nabla J(\theta) &= \sum_{i=1}^H \sum_{h=i}^H \mathbb{E}_{\tau \sim p(\tau; \pi_\theta)} [\bar{\mathcal{R}}_\gamma^{\tau_h} \nabla \log \pi_\theta(a_i | s_i)] \\
 &= \sum_{i=1}^H \mathbb{E}_{\tau \sim p(\tau; \pi_\theta)} \left[ \left( \sum_{h=i}^H \bar{\mathcal{R}}_\gamma^{\tau_h} \right) \nabla \log \pi_\theta(a_i | s_i) \right] \\
 &= \sum_{i=1}^H \mathbb{E}_{\tau \sim p(\tau; \pi_\theta)} [\Psi_i(\tau) \nabla \log \pi_\theta(a_i | s_i)],
 \end{aligned}$$

where  $\Psi_i := \sum_{h=i}^H \gamma^h \bar{\mathcal{R}}(a_h | s_h)$  is the discounted reward after action  $a_i$  given state  $s_i$ . Let

$$\Phi(\theta; \tau) = \sum_{i=1}^H \Psi_i(\tau) \log p(a_i | s_i; \pi_\theta).$$

Using such notation, we have

$$\nabla J(\theta) = \mathbb{E}_{\tau \sim p(\tau; \pi_\theta)} \nabla \Phi(\theta; \tau) = \int_{\tau} p(\tau; \pi_\theta) \nabla \Phi(\theta; \tau) \mathbf{d}\tau.$$

The second order derivative can be computed by

$$\begin{aligned}
 \nabla^2 J(\theta) &= \int_{\tau} \nabla \Phi(\theta; \tau) \nabla p(\tau; \pi_\theta)^\top + p(\tau; \pi_\theta) \nabla^2 \Phi(\theta; \tau) \mathbf{d}\tau \\
 &= \int_{\tau} p(\tau; \pi_\theta) \left[ \nabla \Phi(\theta; \tau) \nabla \log p(\tau; \pi_\theta)^\top + \nabla^2 \Phi(\theta; \tau) \right] \mathbf{d}\tau \\
 &= \mathbb{E}_{\tau \sim p(\tau; \pi_\theta)} \left[ \nabla \Phi(\theta; \tau) \nabla \log p(\tau; \pi_\theta)^\top + \nabla^2 \Phi(\theta; \tau) \right].
 \end{aligned}$$

### 7.3. Detail Hyper-parameter Settings

We present the Hyper-parameter settings in Table 1. The code for our experiments are available in <https://github.com/mlzju/HAPG>.

*Table 1.* Hyper-parameter Settings

|                         | CartPole       | Swimmer | Reacher | Walker2d | Humanoid | HumanoidStandup |
|-------------------------|----------------|---------|---------|----------|----------|-----------------|
| Horizon                 | 100            | 500     | 50      | 500      | 500      | 500             |
| Baseline                | No             | Linear  | Linear  | Linear   | Linear   | Linear          |
| Number of timesteps     | $5 \cdot 10^5$ | $10^7$  | $10^7$  | $10^7$   | $10^7$   | $10^7$          |
| NN sizes                | 8              | 32x32   | 32x32   | 64x64    | 64x64    | 64x64           |
| REINFORCE learning rate | 0.01           | 0.01    | 0.01    | 0.01     | 0.01     | 0.01            |
| REINFORCE batchsize     | 50             | 100     | 100     | 100      | 100      | 100             |
| HAPG learning rate      | 0.01           | 0.01    | 0.01    | 0.01     | 0.01     | 0.01            |
| HAPG $ \mathcal{M}_0 $  | 50             | 100     | 100     | 100      | 100      | 100             |
| HAPG $ \mathcal{M} $    | 10             | 10      | 10      | 10       | 10       | 10              |
| HAPG $p$                | 5              | 10      | 10      | 10       | 10       | 10              |
